# Supplementary material for: Nutritional status and its associated factors among commercial female sex workers in Hawassa city, south Ethiopia
Source: PeerJ journal article supplement (doi:10.7717/peerj.15237), 2023-04-28

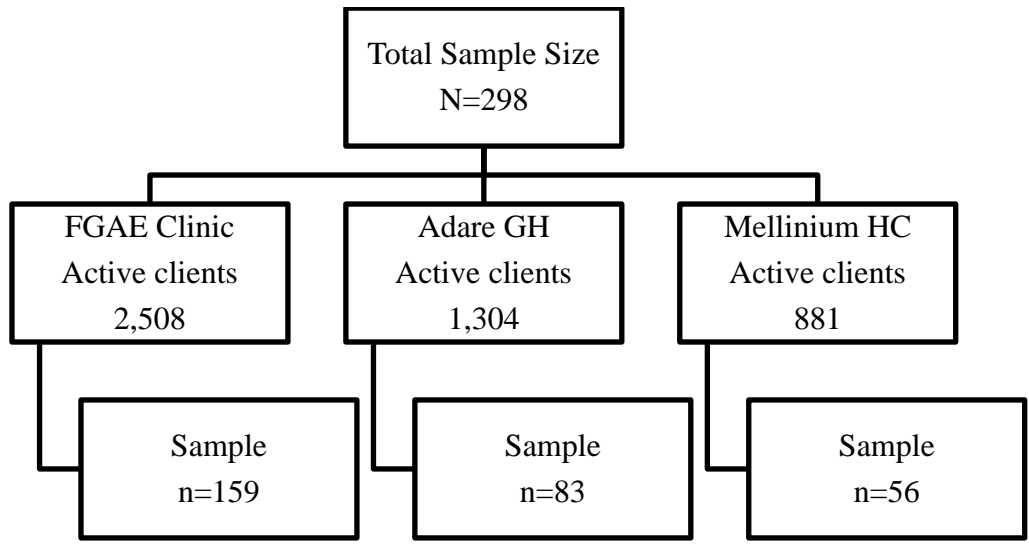

Supplement: Supplemental_Figure_S1.pdf [file Supplemental_Figure_S1.pdf]
